# Supplementary material for: MXene (Ti3C2Tx)/Cellulose Acetate Mixed-Matrix Membrane Enhances Fouling Resistance and Rejection in the Crossflow Filtration Process
Source: MDPI journal article supplement (doi:10.3390/membranes12040406), 2022-04-06
Supplement: s1 [file s1]

Supporting Information

# MXene ( $\text{Ti}_3\text{C}_2\text{T}_x$ )/ cellulose acetate mixed-matrix membrane enhances the fouling resistance and rejection in the crossflow filtration process

Reem S. Azam <sup>a</sup>, Dema A. Almasri,<sup>a</sup> Radwan Alfahel<sup>b</sup>, Alaa H. Hawari<sup>b</sup>, Mohammad K. Hassan<sup>c</sup>, Ahmed A. El-zatahry<sup>d</sup> and Khaled A. Mahmoud <sup>a,c,\*</sup>.

<sup>a</sup> Qatar Environment and Energy Research Institute (QEERI), Hamad Bin Khalifa University (HBKU), Qatar Foundation, P.O. Box 34110, Doha

<sup>b</sup> Department of Civil and Architectural Engineering, Qatar University, P.O. Box 2713, Doha, Qatar.

<sup>c</sup> Center for Advanced Materials, Qatar University P.O. Box 2713, Doha, Qatar.

<sup>d</sup> Materials Science and Technology Program, College of Arts and Sciences, Qatar University, Doha, 2713, Qatar

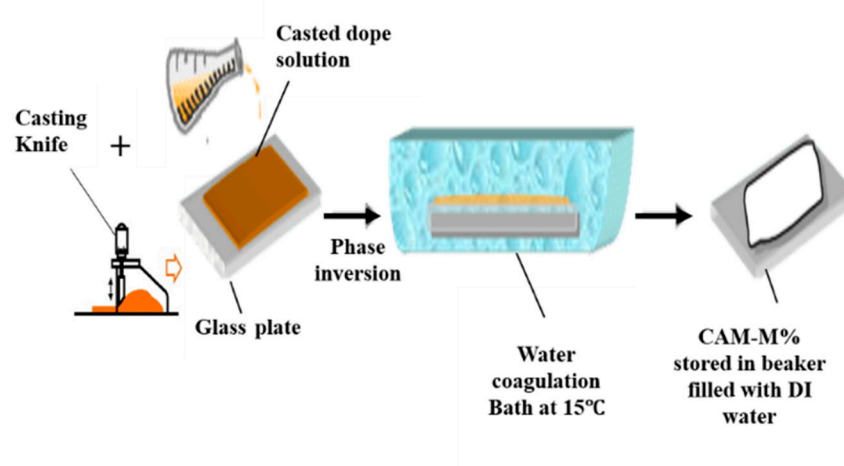

**Figure S1.** Schematic representation of the phase inversion of MXene in cellulose acetate membrane.

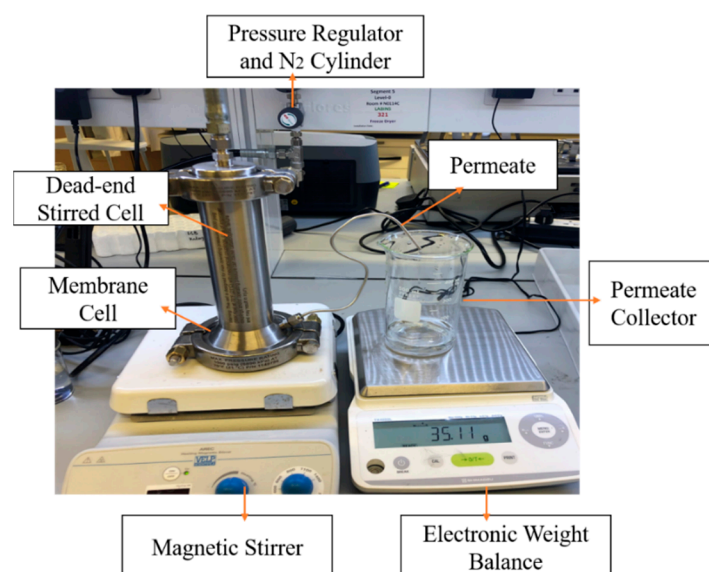

**Figure S2.** Dead-end filtration process setup.

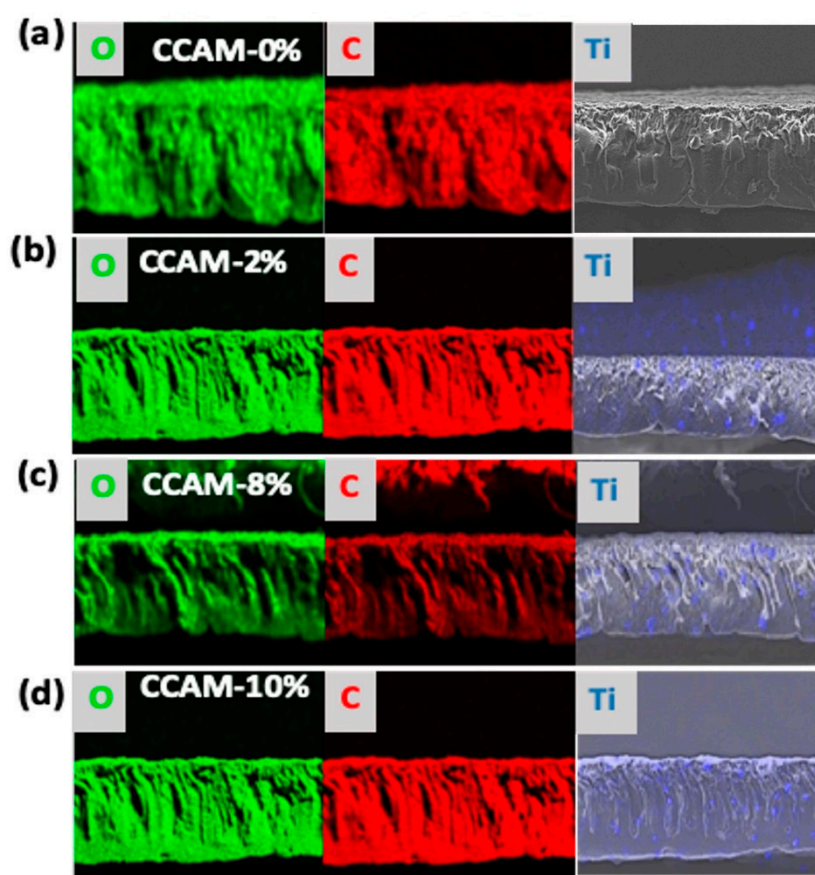

**Figure S3.** EDS cross-section mapping analysis images for (a) CCAM-0%, (b) CCAM-2%, (c) CCAM-8%, and (d) CCAM-10%.

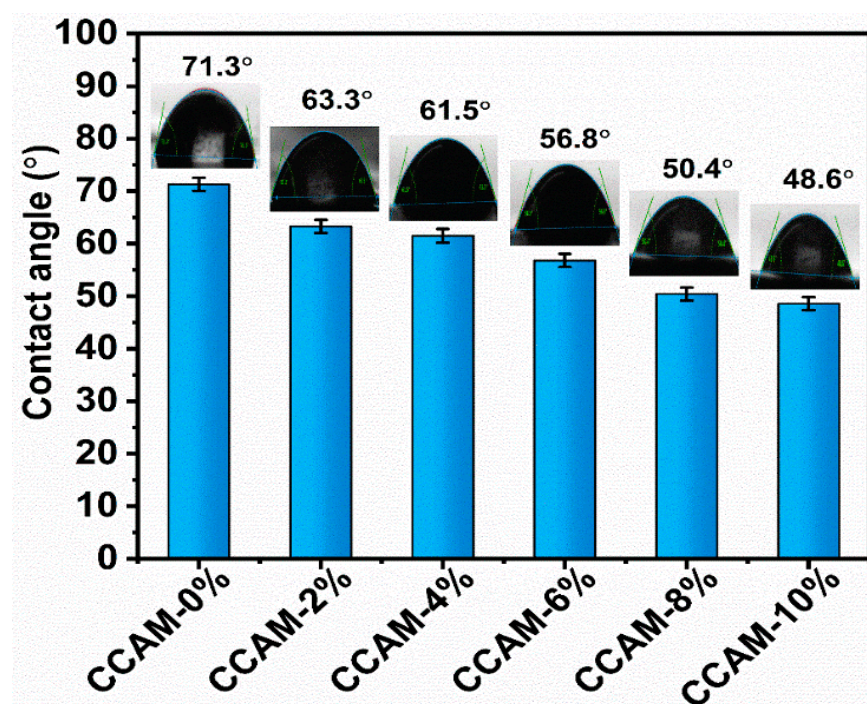

**Figure S4.** Water contact angle of cross-linked CCAM-X% with MXene contents (X) from 0% to 10%.
